# Supplementary material for: Facile selective synthesis and luminescence behavior of hierarchical NaY(WO4)2:Eu3+ and Y6WO12:Eu3+
Source: Royal Society of Chemistry journal article supplement (doi:10.1039/c1ce05107e), 2011-01-01
Supplement: c1ce05107e.pdf [file c1ce05107e.pdf]

### Electronic Supplementary Information

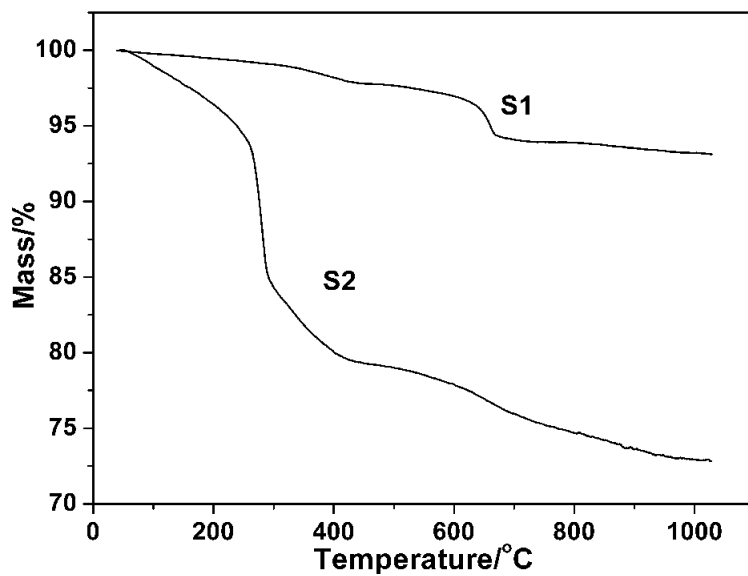

Fig. S1. TGA curves of the as-synthesized precursors (a) S1 and (b) S2.

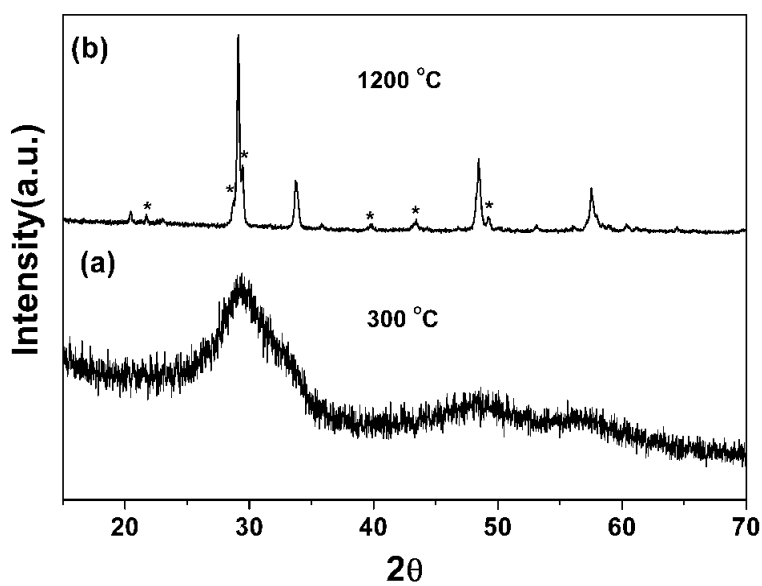

Fig. S2. XRD patterns of the as-calcined S2 at (a) 300 °C and (b) 1200 °C, respectively.

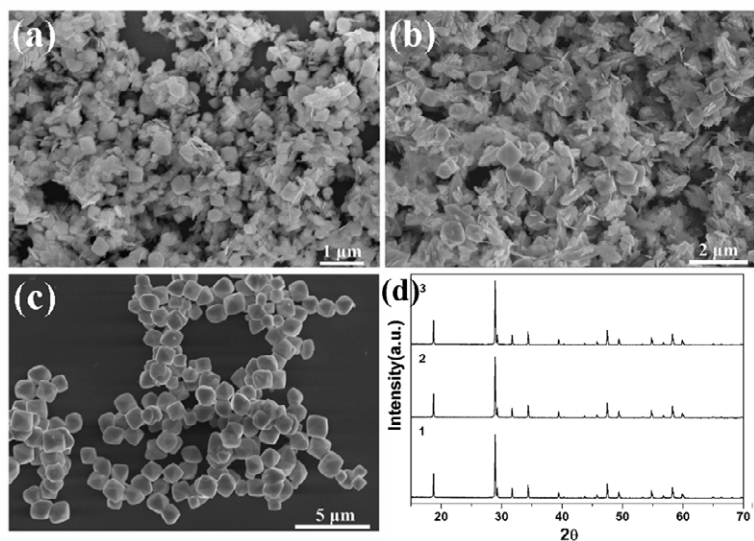

**Fig. S3.** Effects of the agents on the products' morphologies. (a, b) SEM images of the products obtained without  $\text{Na}_2\text{H}_2\text{L}$  in the processes as those of **S1** and **S2**, respectively; (c) SEM image and (d) XRD pattern of the product obtained without adding  $\text{NaOH}$  (1) or  $\text{Na}_2\text{H}_2\text{L}$  as the process of **S1** (2) and **S2** (3).

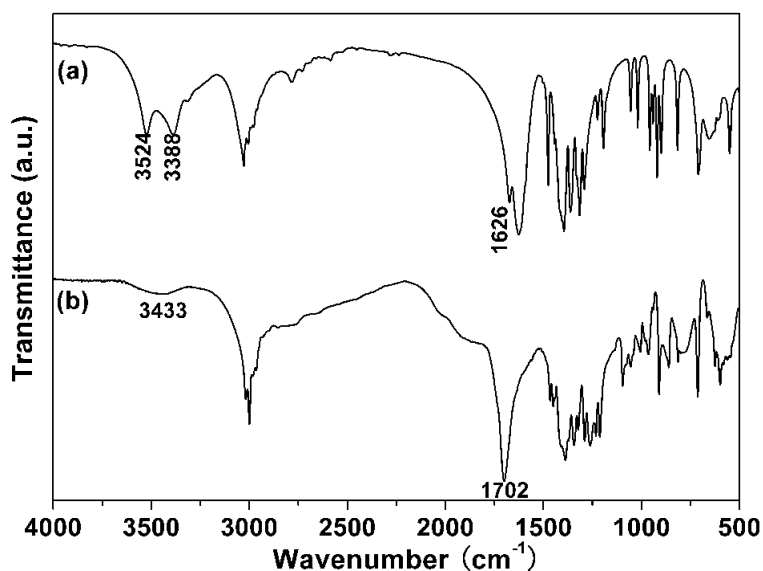

**Fig. S4.** FT-IR spectra of (a) the pure  $\text{Na}_2\text{H}_2\text{L}$  and (b) the intermediate complex.

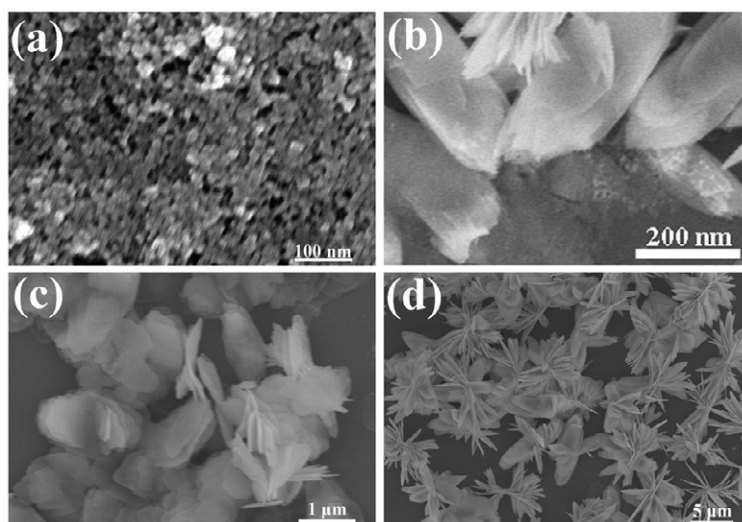

**Fig. S5.** SEM images of the as-synthesized precursor **S1** obtained after the reaction proceeded for (a) 0 h, (b) 2 h, (c) 6 h, (d) 12 h, respectively.
